# Supplementary material
Source: PubMed Central journal article supplement (PMC4808376)
Supplement: NIHMS750454-supplement-Supp_Fig_01-02.pdf [file NIHMS750454-supplement-Supp_Fig_01-02.pdf]

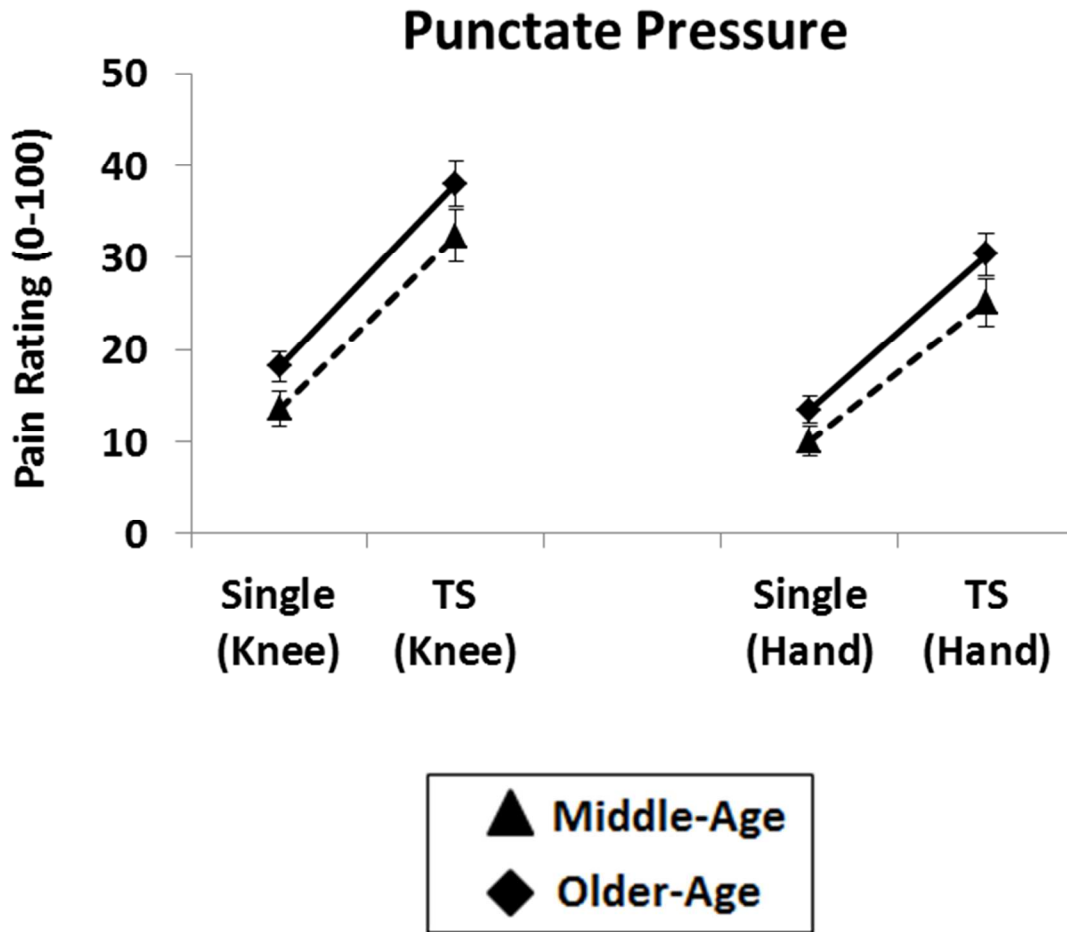

**Supplementary Figure 1.** Adjusted means and standard errors for punctate pressure across age. There were no significant differences across age cohort for punctate pressure and temporal summation (TS) of the hand or knee (all  $p$ 's > .05).

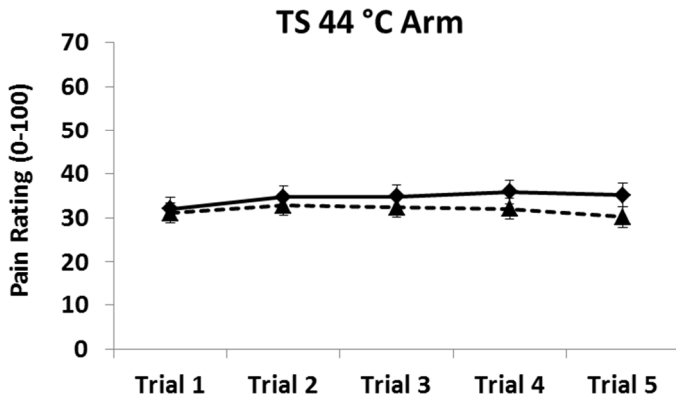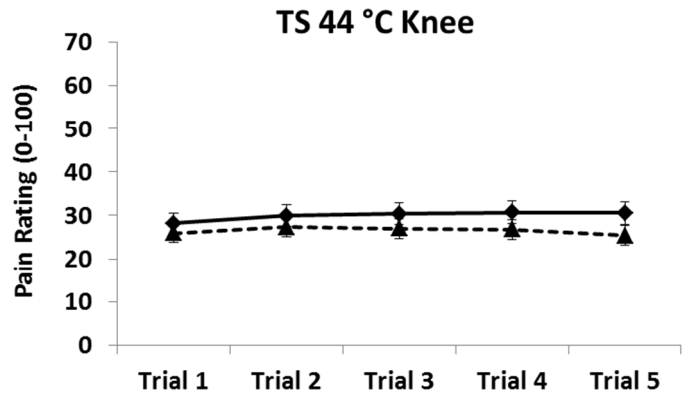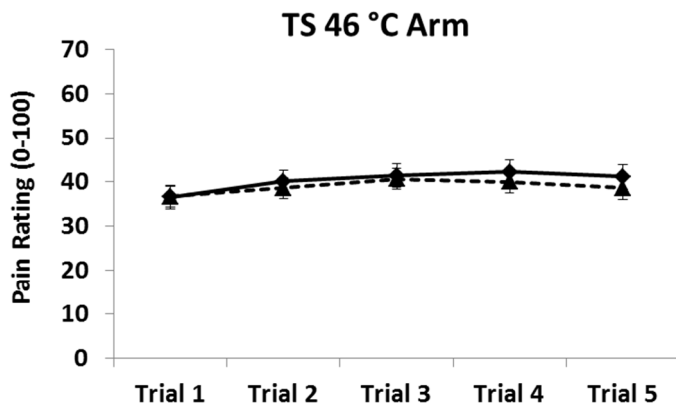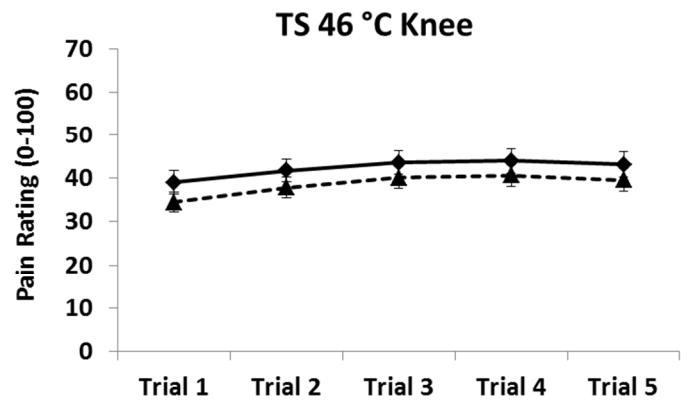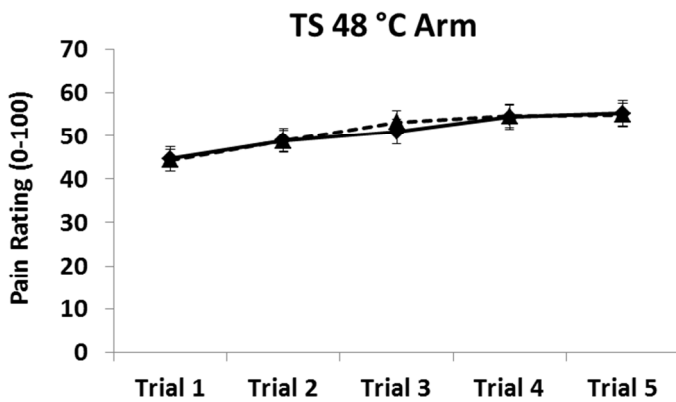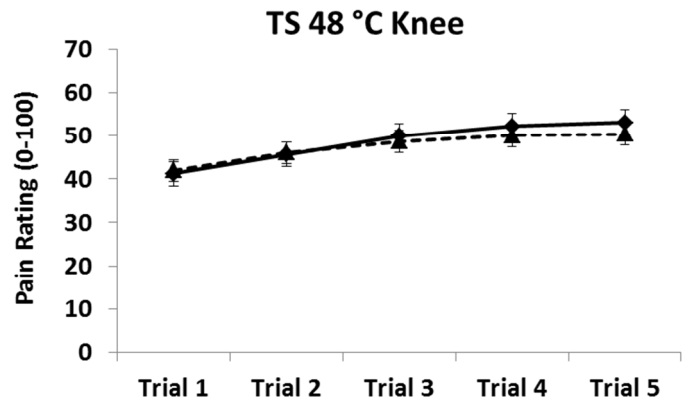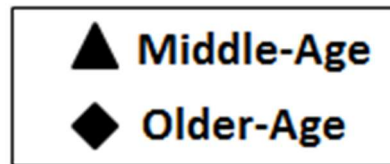

**Supplementary Figure 2.** Adjusted means and standard errors for temporal summation (TS) across age. There were no significant differences across age cohort for TS of heat pain (all  $p$ 's > .05).
